# Supplementary material
Source: publisher figshare collection journal article supplement (https://gsapubs.figshare.com/ndownloader/files/35841530)
Supplement: Supplementary file 1 [file 35841530]

## Sheet: Supplementary DR 1
Table S1: LA-ICP-MS fluid inclusion data (individual analyses)
Rounded to significant digits
Fluid type	Locality	Sample	FIA	NaCleq	Li	B	Na	S	Cl	K	Ca	As	Br	Rb	Sr	Sb	I	Cs	Ba	Cl	Br	I	Br/Cl•10-3	I/Cl•10-6	Br/I
				wt-%	µg/g	µg/g	µg/g	µg/g	µg/g	µg/g	µg/g	µg/g	µg/g	µg/g	µg/g	µg/g	µg/g	µg/g	µg/g	mmol/kg	mmol/kg	mmol/kg	mol/mol	mol/mol	mol/mol
Alpine metamorphic	Thusis	DM2A9	1	3.8	46	720	15000	590	13000	530	440	18	100	7.3	28	5.1	47	47	1.2	370	1.3	0.4	3.5	1081	3
		DM2A9	1	3.8	58	910	15000	1300	27000	900	630	41	270	12	46	8.4	76	58	1.1	760	3.4	0.6	4.5	789	6
		DM2A9	1	3.8	64	960	15000	1600	16000	560	350	23	450	6.6	29	6.3	88	67	2.1	450	5.6	0.7	12.4	1556	8
		DM2A9	1	3.8	47	660	15000	1100	14000	570	440	34	230	10	46	7.9	61	51	1.4	390	2.9	0.5	7.4	1282	6
		DM2A9	1	3.8	38	480	15000	n/a	11000	410	1200	4	180	4.6	42	1.8	91	24	2.2	310	2.3	0.7	7.4	2258	3
		DM2A9	1	3.8	51	730	15000	840	16000	540	400	22	290	9.2	31	6.3	87	48	1.2	450	3.6	0.7	8	1556	5
		DM2A9	1	3.8	38	760	15000	780	15000	560	550	320	310	6.2	22	6.2	68	39	1.2	420	3.9	0.5	9.3	1190	8
		DM2A9	1	3.8	41	590	15000	2800	15000	530	490	22	430	6.1	27	5.4	87	31	0.8	420	5.4	0.7	12.9	1667	8
		DM2A9	2	3.9	53	560	15300	n/a	18000	600	1500	25	110	6.1	19	3.9	100	36	0.6	510	1.4	0.8	2.7	1569	2
		DM2A9	2	3.9	37	750	15300	n/a	17000	520	610	22	160	7.1	33	4.1	54	48	0.9	480	2	0.4	4.2	833	5
		DM2A9	2	3.9	54	720	15300	160	17000	550	1700	29	150	10	35	6.3	50	66	1.4	480	1.9	0.4	4	833	5
		DM2A9	2	3.9	66	600	15400	n/a	11000	450	n/a	25	140	6	30	8.4	72	45	n/a	310	1.8	0.6	5.8	1935	3
		DM2A9	2	3.9	41	750	15300	n/a	19000	550	n/a	31	340	6.6	36	7.8	110	55	2.6	540	4.3	0.9	8	1667	5
		DM2A9	2	3.9	60	370	15400	330	18000	470	2100	20	250	5.5	27	2.2	93	31	0.6	510	3.1	0.7	6.1	1373	4
		DM2A9	2	3.9	48	540	15400	n/a	11000	410	1400	10	85	7.1	24	6.1	34	46	1.2	310	1.1	0.3	3.5	968	4
		DM2A9	2	3.9	63	640	15400	250	12000	420	n/a	23	210	7	26	5.9	82	55	0.9	340	2.6	0.6	7.6	1765	4
		DM2A9	2	3.9	51	710	15200	n/a	14000	630	n/a	22	140	2.4	27	3.1	15	14	n/a	390	1.8	0.1	4.6	256	18
		DM2A9	2	3.9	42	500	15400	160	12000	470	720	18	79	5.6	22	4.2	52	36	0.6	340	1	0.4	2.9	1176	2
		DM2A9	2	3.9	64	740	15300	n/a	16000	560	n/a	22	240	6	27	8.1	88	57	n/a	450	3	0.7	6.7	1556	4
		DM2A9	2	3.9	53	720	15300	n/a	13000	510	740	15	71	6	26	8	61	46	n/a	370	0.9	0.5	2.4	1351	2
		DM2A9	2	3.9	53	680	15300	800	15000	590	650	23	84	7.3	35	4.8	43	43	1.6	420	1.1	0.3	2.6	714	4
		DM2A9	2	3.8	49	560	15300	n/a	13000	810	1600	n/a	160	7.6	26	n/a	63	39	n/a	370	2	0.5	5.4	1351	4
		DM2A9	3	3.8	35	520	12200	250	12000	1200	n/a	10	160	8.6	27	3.7	20	38	n/a	340	2	0.2	5.9	588	10
		DM2A9	3	3.8	46	460	12200	380	16000	390	1900	16	280	3.4	26	3.4	52	27	0.9	450	3.5	0.4	7.8	889	9
		DM2A9	3	3.8	14	180	15900	230	16000	230	750	6.7	180	2	20	3.2	36	11	0.8	450	2.3	0.3	5.1	667	8
	Bedretto	KM-B3	1	0.3	23	240	1200	790	100	25	45	40	5.5	0.1	0.4	2.4	0.6	0.2	0.4	3	0.1	0.005	33	1670	20
		KM-B3	1	0.3	n/a	130	1200	560	140	22	<17	69	8.8	0.1	<0.01	1.7	0.9	0.1	n/a	4	0.1	0.007	25	1750	14
		KM-B3	1	0.3	21	210	1200	850	130	11	<7	47	6.4	0.1	<0.01	0.8	0.5	0.1	<0.1	4	0.1	0.004	25	1000	25
		KM-B3	1	0.3	11	160	1200	530	290	29	110	54	10	0.2	<0.01	1.2	0.4	0.1	<0.1	8	0.1	0.003	13	380	34
		KM-B3	1	0.3	14	160	1200	300	280	110	<14	8.7	19	1.1	n/a	<0.1	1	1.6	<0.1	8	0.2	0.008	25	1000	25
		KM-B3	2	0.3	6.1	180	1200	1200	330	15	<21	86	17	0.1	<0.01	2.5	1.3	0.1	<0.1	9	0.2	0.01	22	1110	20
		KM-B3	2	0.3	34	170	1200	590	130	6.1	21	48	7.4	0.1	<0.01	1	0.4	0.1	<0.1	4	0.1	0.003	25	750	33
		KM-B3	3	0.3	43	190	1200	780	200	5.2	18	140	9.6	0.1	<0.01	1.8	0.7	0.1	<0.1	6	0.1	0.006	17	1000	17
	Gauli	KM-G2	1	4	130	560	15700	420	19000	2600	2500	18	69	42	64	8.3	0.6	16	19	540	0.9	0.005	1.7	9	189
		KM-G2	1	4	120	560	15700	400	27000	3000	1900	0.5	49	29	58	1.4	1.1	6.7	5.1	760	0.6	0.01	0.8	13	62
		KM-G2	1	4	130	600	15700	150	27000	4100	2700	7.9	93	36	51	1.8	0.4	6.8	3.9	760	1.2	0.003	1.6	4	400
		KM-G2	1	4	120	620	15700	540	29000	3400	2000	1.4	57	34	62	1.3	1.3	7.5	5	820	0.7	0.01	0.9	12	75
		KM-G2	1	4	140	730	15700	590	28000	2700	1700	1.4	100	42	81	2.2	1.9	9.1	7.1	790	1.3	0.01	1.6	13	123
		KM-G2	2	3.8	130	630	14800	180	27000	3400	1500	0.6	68	29	47	1.9	0.8	7.2	5.5	760	0.9	0.006	1.2	8	150
		KM-G2	2	3.8	120	600	14800	940	29000	3600	2100	2.6	120	35	47	2.2	2	13	4	820	1.5	0.02	1.8	24	75
		KM-G2	2	3.8	120	600	14800	240	27000	3500	1400	0.5	58	31	43	2.1	0.9	7	4.7	760	0.7	0.007	0.9	9	100
		KM-G2	3	4.1	130	530	16200	150	31000	3200	1800	0.4	62	29	56	1	0.7	6.5	4.4	900	0.8	0.006	1	10	100
		KM-G2	3	4.1	130	670	16200	620	29000	4300	1400	1.5	96	32	43	2.5	1.4	7.5	5.3	820	1.2	0.01	1.5	12	125
		KM-G2	3	4.1	120	590	16200	180	27000	2200	1300	0.4	71	21	31	2.3	1.1	8.9	5.3	760	0.9	0.01	1.2	13	92
		KM-G2	3	4.1	130	620	16200	n/a	44000	5400	1800	1	290	42	56	3.8	2.4	9	6.5	1200	3.6	0.02	3	17	176
		KM-G2	3	4.1	120	590	16200	320	39000	5500	2100	1.4	80	49	56	3.6	1.1	8.4	3.6	1100	1	0.01	0.9	9	100
		KM-G2	3	4.1	120	560	16200	<30	35000	3300	1500	<0.2	160	29	48	1.6	0.4	6.6	4.9	1000	2	0.003	2	3	667
		KM-G2	4	4	130	610	15700	63	28000	3400	1400	0.4	68	28	40	1.7	0.5	7.3	5.1	790	0.9	0.004	1.1	5	220
		KM-G2	4	4	100	580	15700	n/a	30000	3300	2300	0.2	99	33	69	1.5	0.4	6.6	5.3	850	1.2	0.003	1.4	4	350
		KM-G2	4	4	130	640	15700	69	28000	3500	1500	0.3	73	32	47	2.1	0.8	8	5.4	790	0.9	0.006	1.1	8	138
	Tiefengletscher	KM-P1	1	5.7	180	170	22500	790	41000	7800	1700	32	53	110	180	2.2	2.1	14	7	1200	0.7	0.02	0.6	17	35
		KM-P1	1	5.7	160	140	22500	990	40000	6800	1800	31	200	93	140	2.7	1.9	12	6.6	1100	2.5	0.01	2.3	9	256
		KM-P1	1	5.7	160	170	22500	420	43000	7700	1600	22	83	110	170	2	1.4	13	6.4	1200	1	0.01	0.8	8	100
		KM-P1	1	5.7	160	140	22500	820	37000	6900	2000	40	130	99	120	24	2.3	17	5.3	1000	1.6	0.02	1.6	20	80
		KM-P1	1	5.7	210	210	22500	n/a	57000	8300	2300	29	290	95	130	3	9.2	18	8.5	1600	3.6	0.07	2.3	44	52
		KM-P1	1	5.7	180	150	22500	630	45000	8000	1500	31	120	110	160	1.6	1.6	14	6.9	1300	1.5	0.01	1.2	8	150
		KM-P1	2	7.2	230	250	28500	1100	66000	16300	1500	42	170	95	39	3	2.1	14	22	1900	2.1	0.02	1.1	11	100
		KM-P1	3	7.4	210	220	29200	2500	68000	14500	1400	30	440	78	28	2.1	5.2	12	9.8	1900	5.5	0.04	2.9	21	138
		KM-P1	3	7.4	270	230	29200	3300	84000	12700	2100	18	300	110	50	2.7	3.7	12	23	2400	3.8	0.03	1.6	13	123
		KM-P1	3	7.4	210	190	29200	n/a	57000	12200	1400	32	240	66	30	2.6	1.7	11	19	1600	3	0.01	1.9	6	317
		KM-P1	4	7.3	210	270	28800	n/a	52000	11200	2000	51	160	62	29	5.3	2.7	20	26	1500	2	0.02	1.3	13	100
		KM-P1	4	7.3	230	250	28800	2400	67000	14600	2000	18	160	88	43	2.5	1.5	12	22	1900	2	0.01	1.1	5	220
		KM-P1	5	7.3	230	240	28700	3500	60000	13300	2000	49	190	74	35	2.9	4.1	15	26	1700	2.4	0.03	1.4	18	78
		KM-P1	6	6.2	170	180	24500	300	51000	8500	1800	30	86	88	170	1.8	1.4	10	9.7	1400	1.1	0.01	0.8	7	114
		KM-P1	6	6.2	180	140	24500	n/a	45000	7600	1300	16	36	46	99	1.5	0.8	7.6	30	1300	0.5	0.006	0.4	5	80
		KM-P1	6	6.2	89	220	24500	710	45000	7200	1400	28	100	97	180	2.3	1.9	14	11	1300	1.3	0.01	1	8	125
		KM-P1	6	6.2	190	180	24500	1100	43000	6900	1600	21	120	99	200	2.8	2.3	14	11	1200	1.5	0.02	1.3	17	76
		KM-P1	6	6.2	180	110	24500	890	55000	8600	1900	36	170	96	170	1.9	2.1	11	8.9	1600	2.1	0.02	1.3	13	100
		KM-P1	7	6.8	220	260	26800	1300	53000	10600	2300	34	200	59	33	2.3	2.1	21	23	1500	2.5	0.02	1.7	13	131
		KM-P1	7	6.8	230	230	26800	3600	50000	10500	1700	3.2	88	61	37	1.2	1.9	12	23	1400	1.1	0.01	0.8	7	114
		KM-P1	7	6.8	190	250	26800	2600	61000	12900	n/a	33	200	76	36	2.5	1.6	11	20	1700	2.5	0.01	1.5	6	250
Orogenic Au	Ore stage fluid	PAM-19A-I	1	6.4	130	850	25000	4200	35000	2400	99	940	950	19	11	1.8	3.1	8	<0.1	1000	10	0.02	10	20	500
		PAM-19A-I	1	6.4	84	650	25000	1200	52000	1900	n/a	980	2600	38	7.8	0.3	2.3	5.6	0.3	1500	30	0.02	20	13	1538
		PAM-19A-I	1	6.4	40	880	25000	3500	35000	2000	n/a	670	710	14	3.5	0.2	1.2	6.5	<0.1	1000	10	0.01	10	10	1000
		PAM-19A-I	1	6.4	46	810	25000	3000	38000	2200	73	1200	980	16	2.5	<0.02	0.8	6.6	<0.1	1100	10	0.006	9.1	5	1820
		PAM-19A-I	1	6.4	66	880	25000	2800	35000	2200	72	450	940	18	3.6	<0.1	1.9	8.6	<0.2	1000	10	0.01	10	10	1000
		PAM-19A-I	1	6.4	62	810	25000	1400	48000	400	160	500	1200	2.9	8.3	<0.04	2.7	5.2	0.2	1400	20	0.02	14.3	14	1021
		PAM-19A-I	2	6.6	120	590	25900	2400	57000	1600	n/a	630	3900	12	7.6	0.3	3	4.8	3.8	1600	50	0.02	31.3	13	2408
		PAM-19A-I	2	6.6	120	840	25900	2600	40000	3200	n/a	2500	1300	27	27	19	2.4	9.3	0.9	1100	20	0.02	18.2	18	1011
		PAM-19A-I	3	6.5	110	960	25700	1100	37000	2000	200	540	510	19	17	0.8	1.8	7.2	0.2	1000	10	0.01	10	10	1000
		PAM-19A-I	3	6.5	42	910	25700	1200	33000	1600	110	450	680	16	13	1.1	4.2	6.6	<0.1	900	10	0.03	11	30	367
		PAM-19A-I	3	6.5	95	400	25700	2000	44000	1700	120	610	750	10	7.1	0.3	2.7	3.4	<0.1	1200	10	0.02	8.3	17	488
		PAM-19A-I	3	6.5	85	940	25700	2400	46000	2100	n/a	730	1800	18	4.6	0.3	2.7	7.1	<0.1	1300	20	0.02	15.4	15	1027
		PAM-19A-I	3	6.5	19	850	25700	3100	35000	2400	n/a	2600	1500	22	11	14	3.5	9.1	0.3	1000	20	0.03	20	30	667
		PAM-19A-I	3	6.5	37	840	25700	2600	47000	2000	n/a	1200	2200	18	9.1	0.7	3.9	8.8	0.5	1300	30	0.03	23.1	23	1004
		PAM-19A-I	4	7	15	980	27700	1500	42000	1900	n/a	810	1300	19	n/a	0.4	3.5	5.8	4.3	1200	20	0.03	16.7	25	668
		PAM-19A-I	4	7	110	1000	27700	3600	36000	2000	n/a	890	1300	14	5.4	0.6	5.3	7.9	<0.1	1000	20	0.04	20	40	500
		PAM-19A-I	4	7	120	900	27700	3000	50000	3100	n/a	930	1100	31	7.2	0.4	3	10	<0.1	1400	10	0.02	7.1	14	507
		PAM-19A-I	4	7	97	940	27700	1100	46000	2000	450	510	1400	17	19	0.8	1.2	6	0.5	1300	20	0.01	15.4	8	1925
		PAM-19A-I	4	7	99	970	27700	2800	48000	1800	290	820	1300	16	4.5	3.7	3.5	5.6	0.4	1400	20	0.03	14.3	21	681
		PAM-19A-I	4	7	95	770	27700	2900	42000	2100	150	1100	1000	19	7.2	0.1	3	7	<0.1	1200	10	0.02	8.3	17	488
		PAM-19A-I	4	7	100	660	27700	1300	52000	1700	n/a	300	2300	13	17	0.3	3.4	3	<0.1	1500	30	0.03	20	20	1000
		PAM-19A-I	5	6.4	64	440	25300	3400	47000	2400	25	1500	670	19	5.4	0.3	2.3	5.7	0.3	1300	10	0.02	7.7	15	513
		PAM-19A-I	5	6.4	54	760	25300	2900	50000	2500	n/a	1400	1800	27	11	1.5	1.9	8.2	0.5	1400	20	0.01	14.3	7	2043
		PAM-19A-I	5	6.4	50	970	25300	1900	47000	2300	560	540	1300	17	16	1	2.3	5.2	0.1	1300	20	0.02	15.4	15	1027
		PAM-19A-I	5	6.4	31	820	25300	4000	36000	2300	240	1800	500	25	12	0.9	1.5	7.9	<0.1	1000	10	0.01	10	10	1000
		PAM-19A-I	5	6.4	94	1000	25300	3800	51000	3200	n/a	1800	1100	27	13	0.8	3.6	9.3	<0.1	1400	10	0.03	7.1	21	338
	Late stage fluid	PAM-A	1	4.3	210	1400	17000	1500	48000	3800	n/a	870	1700	41	110	130	4.4	26	26	1400	20	0.03	14.3	21	681
		PAM-A	1	4.3	120	760	17000	1000	22000	2100	n/a	410	940	25	64	73	3.4	16	17	620	10	0.03	16.1	48	335
		PAM-A	1	4.3	92	720	17000	n/a	27000	1700	n/a	500	3000	16	67	91	1.6	12	15	760	40	0.01	52.6	13	4046
		PAM-A	1	4.3	80	580	17000	410	17000	1400	37	260	640	17	33	55	1.4	10	11	480	10	0.01	20.8	21	990
		PAM-A	1	4.3	86	670	17000	n/a	23000	1900	n/a	410	1800	22	51	71	3.5	12	13	650	20	0.03	30.8	46	670
		PAM-A	1	4.3	140	1200	17000	730	38000	3200	220	650	1400	30	37	90	2.5	22	21	1100	20	0.02	18.2	18	1011
		PAM-A	1	4.3	77	550	17000	720	21000	1700	49	330	1200	16	20	43	2.7	8.1	7.2	590	20	0.02	33.9	34	997
		PAM-A	1	4.3	120	510	17000	1100	26000	1900	64	450	1000	17	60	37	2.7	6.5	10	730	10	0.02	13.7	27	507
		PAM-A	1	4.3	130	880	17000	940	23000	2500	n/a	490	1200	25	34	110	3.2	18	18	650	20	0.03	30.8	46	670
		PAM-A	1	4.3	100	850	17000	n/a	34000	2800	180	680	1100	25	85	74	4.2	12	17	1000	10	0.03	10	30	333
		PAM-A	1	4.3	89	650	17000	n/a	22000	2000	97	400	870	24	74	70	2.3	13	13	620	10	0.02	16.1	32	503
		PAM-A	1	4.3	96	700	17000	n/a	28000	2100	n/a	520	2500	23	77	76	3.1	13	14	790	30	0.02	38	25	1520
		PAM-A	1	4.3	98	790	17000	n/a	22000	1900	n/a	440	1100	26	69	82	2.6	16	14	620	10	0.02	16.1	32	503
		PAM-A	1	4.3	110	620	17000	n/a	24000	2300	31	470	1500	25	31	75	2.2	13	14	680	20	0.02	29.4	29	1014
		PAM-A	1	4.3	110	700	17000	n/a	27000	2200	120	510	1800	30	30	76	2.5	15	14	760	20	0.02	26.3	26	1012
		PAM-A	2	4.1	150	250	16200	n/a	21000	1100	n/a	350	1400	9.2	30	31	2.5	4.5	6.1	590	20	0.02	33.9	34	997
		PAM-A	2	4.1	97	700	16200	780	23000	2000	n/a	420	830	17	49	56	2.4	12	14	650	10	0.02	15.4	31	497
		PAM-A	2	4.1	130	110	16200	n/a	24000	940	n/a	470	4000	5.4	30	13	3.6	1.3	3.7	680	50	0.03	73.5	44	1670
		PAM-A	2	4.1	91	540	16200	n/a	20000	1800	n/a	440	1200	19	24	77	1.4	9.9	11	560	20	0.01	35.7	18	1983
		PAM-A	2	4.1	100	660	16200	200	21000	1900	39	360	660	21	63	38	0.9	13	12	590	10	0.007	16.9	12	1408
		PAM-A	2	4.1	120	830	16200	n/a	23000	2200	260	490	1200	23	73	65	1.9	15	16	650	20	0.01	30.8	15	2053
		PAM-A	2	4.1	89	760	16200	n/a	16000	1700	750	340	850	24	27	69	0.9	16	16	450	10	0.007	22.2	16	1388
		PAM-A	3	4.1	110	810	16300	n/a	31000	2500	n/a	620	1200	25	80	72	1.7	11	15	900	20	0.01	22	10	2200
		PAM-A	3	4.1	140	700	16300	n/a	19000	1600	n/a	370	890	18	47	40	2.8	15	15	540	10	0.02	18.5	37	500
		PAM-A	3	4.1	110	740	16300	n/a	30000	2900	n/a	770	1200	39	120	100	4.5	15	19	850	20	0.04	23.5	47	500
		PAM-A	3	4.1	190	1400	16300	n/a	53000	4000	170	1000	1700	50	67	120	4.5	21	20	1500	20	0.04	13.3	27	493
n/a = Element signal strongly affected by analytical artifacts (e.g. spikes) resulting in meaningless concentration values
Ca concentrations in low-Ca Bedretto and Pampalo fluids are to be considered information values due to potential Si-O oxide interference effects on Ca measurements.

## Sheet: G50182
Fusswinkel, T., Niinikoski-Fusswinkel, P., and Wagner, T., 2022, Halogen ratios in crustal fluids through time—Proxies for the emergence of aerobic life?: Geology, v. 50, https://doi.org/10.1130/G50182.1
